# Supplementary material
Source: PubMed Central journal article supplement (PMC4394311)
Supplement: pnas.201422930SI.pdf [file pnas.201422930SI.pdf]

# Supporting Information

Jiang et al. 10.1073/pnas.1422930112

## SI Text

Statistical tests were conducted to determine whether the two LF pairs differed significantly in INS. Based on the involvement level of the followers, the two LF pairs were labeled as LF1 (more involvement) and LF2 (less involvement), respectively. For each channel, after converting the INS increases into  $z$  values, one-sample  $t$  test was performed on the mean  $z$  values across the participant pairs ( $P < 0.05$ , corrected by FDR). In addition, an ANOVA was performed on each channel across all groups to detect any differences across the three pairs ( $P < 0.05$ , corrected by FDR).

For both pairs of LF, a significant INS increase was found at CH6 (LF1:  $t_{(10)} = 4.891$ ,  $P = 0.001$ ; LF2:  $t_{(10)} = 3.253$ ,  $P = 0.009$ ) (Fig. S2). The ANOVA revealed significant differences among the LF1, LF2, and FF pairs at CH6 ( $F_{(2,30)} = 5.544$ ,  $P = 0.009$ ). Further post hoc analysis showed significant differences between LF1 and FF ( $P = 0.003$ ) and between LF2 and FF ( $P = 0.023$ ), but not between LF1 and LF2 ( $P = 0.434$ ). Given these results, the two LF pairs were combined for all analyses reported in the paper.

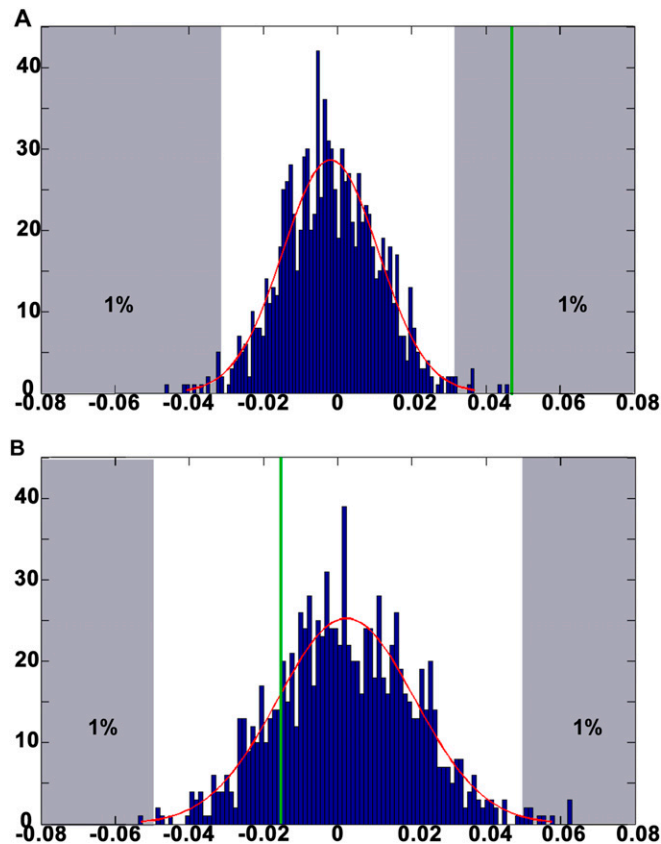

**Fig. S1.** Results of permutation analysis (between-group randomization 1,000 times). The figure shows the distributions of the permuted INS increases at CH6 for the LF pairs (A) and FF pairs (B). The upper and lower 1% areas are highlighted by gray rectangles. The green lines indicate the positions of the true means of the original 11 groups. Please note that the mean for the original LF pairs was within the 1% area whereas that for the original FF pairs was not.

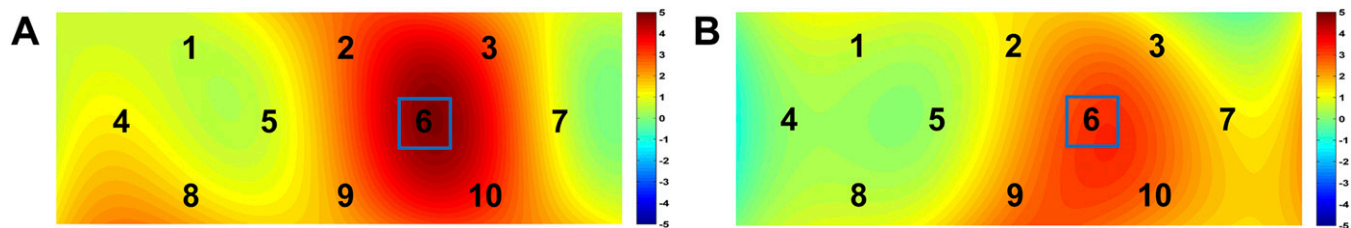

Fig. 52. Shown are t maps for the INS increases for LF1 (A) and LF2 (B).

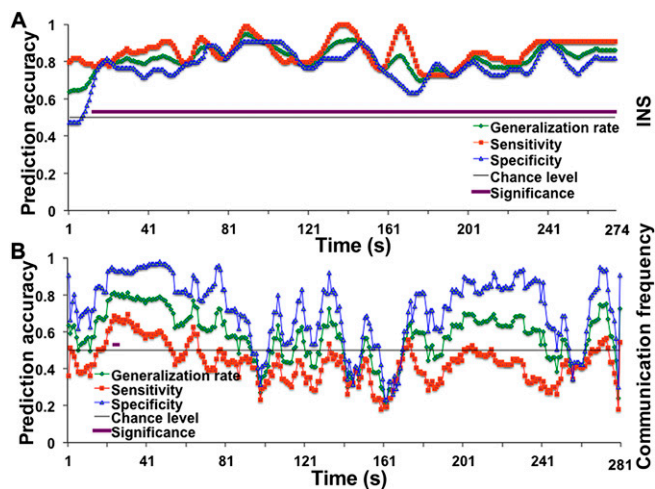

Fig. 53. Time course of prediction accuracy based on the moment-to-moment data. (A) Prediction results based on the INS data. (B) Prediction results based on communication frequency. There were a total of 274 time points for A after shifting 6 s toward the left due to fNIRS signal delay (*Materials and Methods*) and 280 time points for B. The time courses were smoothed by using a moving average method (span = 9 s). The purple line above the chance-level line indicates the time points where all three accuracy indexes were significantly higher than the chance level (0.50).
